# Supplementary material
Source: PubMed Central journal article supplement (PMC3794463)
Supplement: NIHMS511879-supplement-Online_Supplement.pdf [file NIHMS511879-supplement-Online_Supplement.pdf]

**Diabetes Augments and Inhaled Nitric Oxide Prevents the Adverse Hemodynamic Effects of Transfusing Syngeneic Stored Blood in Mice**

Binglan Yu, Chong Lei, David M. Baron, Andrea U. Steinbicker, Kenneth D. Bloch, Warren M. Zapol

Anesthesia Center for Critical Care Research, Department of Anesthesia, Critical Care and Pain Medicine, Harvard Medical School at Massachusetts General Hospital, Boston, MA, USA 02114

## Supplemental Tables

Table S1. Primers used in qRT-PCR

| Gene | mRNA<br>reference | Primer sequence       |                         |
|------|-------------------|-----------------------|-------------------------|
|      |                   | Forward               | Reverse                 |
| HO-1 | NM_010442         | AAGCCGAGAATGCTGAGTTCA | GCCGTGTAGATATGGTACAAGGA |
| 18S  | NM_001081135      | CGGCTACCACATCCAAGGAA  | GCTGGAATTACCGCGGCT      |

HO-1, heme oxygenase-1; 18S, 18S ribosomal RNA

**Table S2. Number of mice and transfusions in WT, HFD-fed WT, or db/db mice.**

| Type of transfusion           | Number of mice |                  |             |                    |
|-------------------------------|----------------|------------------|-------------|--------------------|
|                               | Awake WT       | Awake HFD-fed WT | Awake db/db | Anesthetized db/db |
| FRBCs                         | 5              | 6                | 9           | 7                  |
| SRBCs                         | 6              | 6                | 12          | 7                  |
| SRBCs+iNO                     |                |                  | 9           |                    |
| Supernatant of FRBCs          |                |                  | 11          | 6                  |
| Supernatant of SRBCs          |                |                  | 7           | 6                  |
| Washed FRBCs                  |                |                  | 9           |                    |
| Washed SRBCs                  |                |                  | 6           |                    |
| Oxidized supernatant of SRBCs |                |                  | 6           |                    |

**Table S3. Comparison of hematological changes in WT, db/db or HFD-fed WT mice 10 minutes or 2 hours after transfusion of FRBCs or SRBCs**

|                   | WT mice  |                       |                        | db /db mice |                       |                       | HFD-fed WT mice |                       |                       |
|-------------------|----------|-----------------------|------------------------|-------------|-----------------------|-----------------------|-----------------|-----------------------|-----------------------|
|                   | Control  | FRBCs                 | SRBCs                  | Control     | FRBCs                 | SRBCs                 | Control         | FRBCs                 | SRBCs                 |
|                   | (n=5)    | (n=6)                 | (n=6)                  | (n=5)       | (n=6)                 | (n=6)                 | (n=5)           | (n=6)                 | (n=6)                 |
| <u>10 min</u>     |          |                       |                        |             |                       |                       |                 |                       |                       |
| Hct (%)           | 39±0     | 44±1 <sup>*</sup>     | 46±1 <sup>*†</sup>     | 37±1        | 44±1 <sup>*</sup>     | 43±1 <sup>*</sup>     |                 |                       |                       |
| Hb (g/dl)         | 12.8±0.2 | 14.3±0.4 <sup>*</sup> | 15.1±0.2 <sup>*†</sup> | 12.2±0.4    | 14.4±0.3 <sup>*</sup> | 13.9±0.3 <sup>*</sup> |                 |                       |                       |
| Plasma Hb (mg/dl) | 24±2     | 41±7                  | 119±5 <sup>*†</sup>    | 36±5        | 49±7                  | 123±15 <sup>*†</sup>  |                 |                       |                       |
| <u>2 h</u>        |          |                       |                        |             |                       |                       |                 |                       |                       |
| Hct (%)           | 39±1     | 46±1 <sup>*</sup>     | 47±1 <sup>*</sup>      | 42±1        | 48±1 <sup>*</sup>     | 49±1 <sup>*</sup>     | 39±1            | 46±1 <sup>*</sup>     | 46±1 <sup>*</sup>     |
| Hb (g/dl)         | 12.7±0.3 | 14.9±0.2 <sup>*</sup> | 15.5±0.2 <sup>*</sup>  | 13.6±0.3    | 15.5±0.2 <sup>*</sup> | 16.1±0.2 <sup>*</sup> | 12.7±0.3        | 14.9±0.4 <sup>*</sup> | 15.2±0.3 <sup>*</sup> |
| Plasma Hb (mg/dl) | 27±2     | 37±7                  | 92±12 <sup>*†</sup>    | 37±4        | 47±4                  | 117±23 <sup>*†</sup>  | 34±6            | 42±7                  | 113±12 <sup>*†</sup>  |

Values are mean  $\pm$  SEM. FRBCs, infusing red blood cells stored for less than 24 hours; SRBCs, infusing red blood cells stored for 2 weeks; Hb, hemoglobin; Hct, hematocrit. \* $p < 0.01$  differs vs control; † $p < 0.05$ , ‡ $p < 0.01$  differs vs FRBCs.

**Table S4. Hemolysis (%) of FRBCs or SRBCs after washing with various concentrations of sodium chloride**

| Sodium chloride (g%) | Hemolysis of FRBCs (%<br>, n=3) | Hemolysis of SRBCs (%<br>, n=3) |
|----------------------|---------------------------------|---------------------------------|
| 1.1                  | 0.3±0.1                         | 26.8±2.2                        |
| 1.2                  | 0.3±0.1                         | 10.5±1.3                        |
| 1.3                  | 0.3±0.1                         | 5.4±0.7                         |
| 1.4                  | 0.4±0.1                         | 2.8±0.1                         |
| 1.5                  | 0.4±0.1                         | 2.5±0.5                         |

FRBCs, red blood cells stored for less than 24 hours; SRBCs, red blood cells stored for 2 weeks
